# Supplementary material for: Anthropogenic CO 2 emission estimates in the Tokyo metropolitan area from ground-based CO 2 column observations
Source: Copernicus journal article supplement (doi:10.5194/acp-23-15097-2023), 2023-12-07
Supplement: Supplementary file 1 [file acp-23-15097-2023-supplement.pdf]

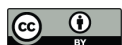

*Supplement of*

## **Anthropogenic CO<sub>2</sub> emission estimates in the Tokyo metropolitan area from ground-based CO<sub>2</sub> column observations**

**Hirofumi Ohyama et al.**

*Correspondence to:* Hirofumi Ohyama (oyama.hirofumi@nies.go.jp) and Matthias M. Frey (frey.matthias.max@nies.go.jp)

The copyright of individual parts of the supplement might differ from the article licence.

## Supplementary material

**Table S1.** Biogenic CO<sub>2</sub> fluxes used for estimating the XCO<sub>2</sub> uncertainty resulting from the uncertainty in the biogenic flux.

| Data                | Temporal resolution | Spatial resolution | Flux                                  |
|---------------------|---------------------|--------------------|---------------------------------------|
| VISITc*             | Hourly              | ~0.31°             | Net ecosystem exchange                |
| SiB4                | Hourly              | 0.5°               | Net ecosystem exchange                |
| CarbonTracker 2019B | 3-hourly            | 1°                 | Optimized biogenic and oceanic fluxes |
| BEAMS               | Monthly             | 30 arcsec          | Net ecosystem exchange                |

\*Downscaled by green vegetation fraction data

**Table S2.** Annual CO<sub>2</sub> emissions in fiscal year 2015 reported by four administrative divisions located in southern Kanto.

| Division | Annual CO <sub>2</sub> emission<br>(Mt-CO <sub>2</sub> yr <sup>-1</sup> ) | Reference                                                                                                                                                                           |
|----------|---------------------------------------------------------------------------|-------------------------------------------------------------------------------------------------------------------------------------------------------------------------------------|
| Tokyo    | 60.33                                                                     | <a href="https://www.kankyo.metro.tokyo.lg.jp/en/climate/index.files/Tokyo_GHG_2019.pdf">https://www.kankyo.metro.tokyo.lg.jp/en/climate/index.files/Tokyo_GHG_2019.pdf</a>         |
| Chiba    | 78.497                                                                    | <a href="https://www.pref.chiba.lg.jp/shigen/chikyuukankyou/documents/2017haisyutsuryou.pdf">https://www.pref.chiba.lg.jp/shigen/chikyuukankyou/documents/2017haisyutsuryou.pdf</a> |
| Kanagawa | 70.24                                                                     | <a href="https://www.pref.kanagawa.jp/documents/9881/g hg_siryō.pdf">https://www.pref.kanagawa.jp/documents/9881/g hg_siryō.pdf</a>                                                 |
| Saitama  | 41.541                                                                    | <a href="https://www.pref.saitama.lg.jp/documents/25672/r4zentaihoukokusyo.pdf">https://www.pref.saitama.lg.jp/documents/25672/r4zentaihoukokusyo.pdf</a>                           |

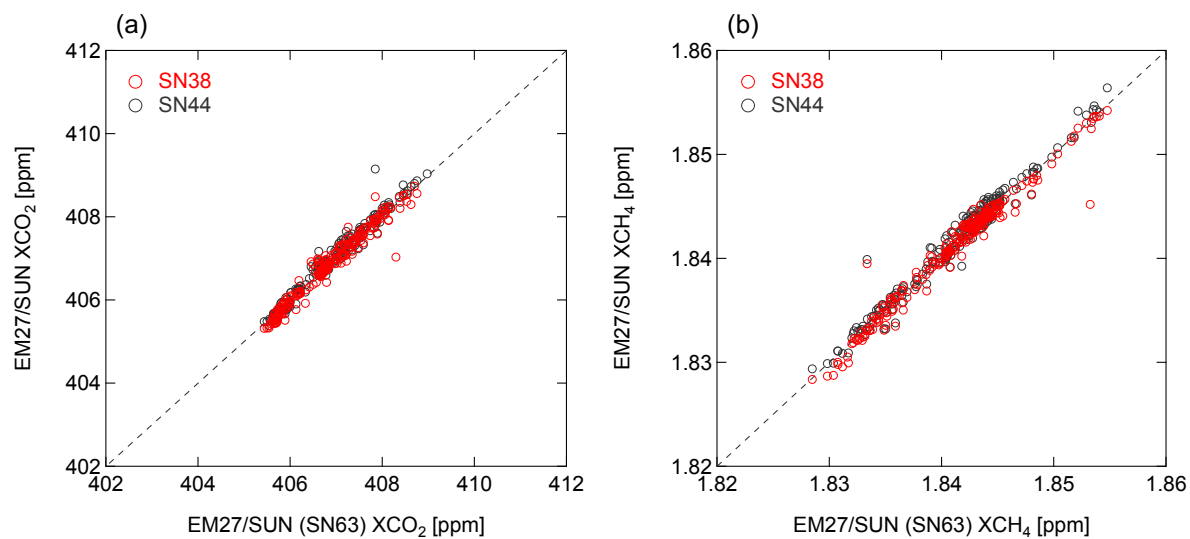

**Figure S1.** Scatter plots of bias-corrected SN38 and SN44 EM27/SUN data with respect to the SN63 EM27/SUN data for (a)  $XCO_2$  and (b)  $XCH_4$ . Dashed lines denote the one-to-one line.

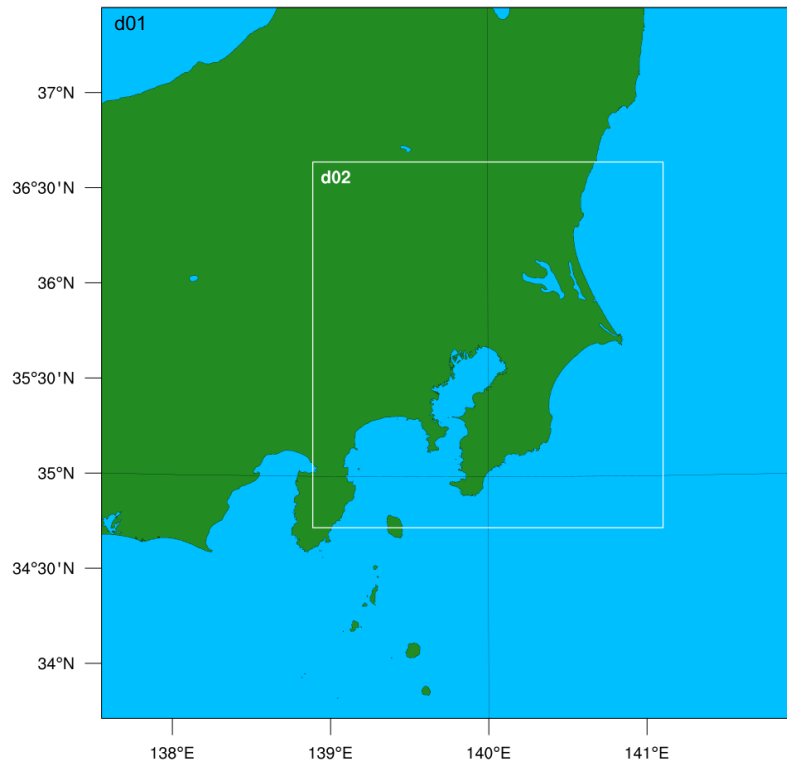

**Figure S2.** Domain configuration for the WRF simulation.

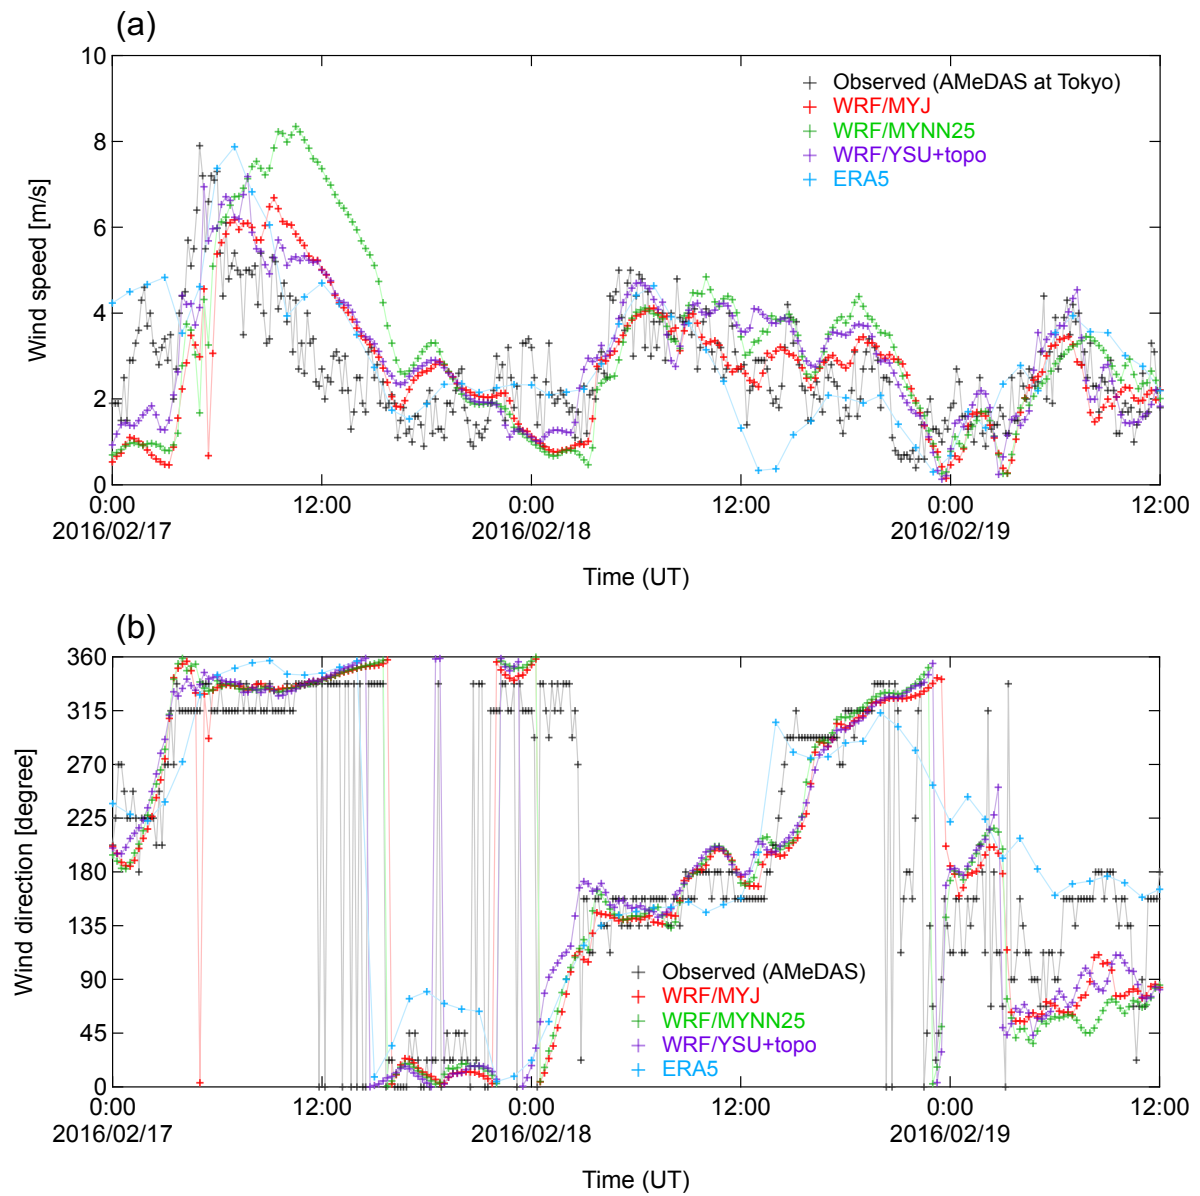

**Figure S3.** (a) Wind speed and (b) wind direction at the Tokyo AMeDAS station. The model data from the WRF simulations using different PBL schemes and the ERA5 reanalysis are also shown.

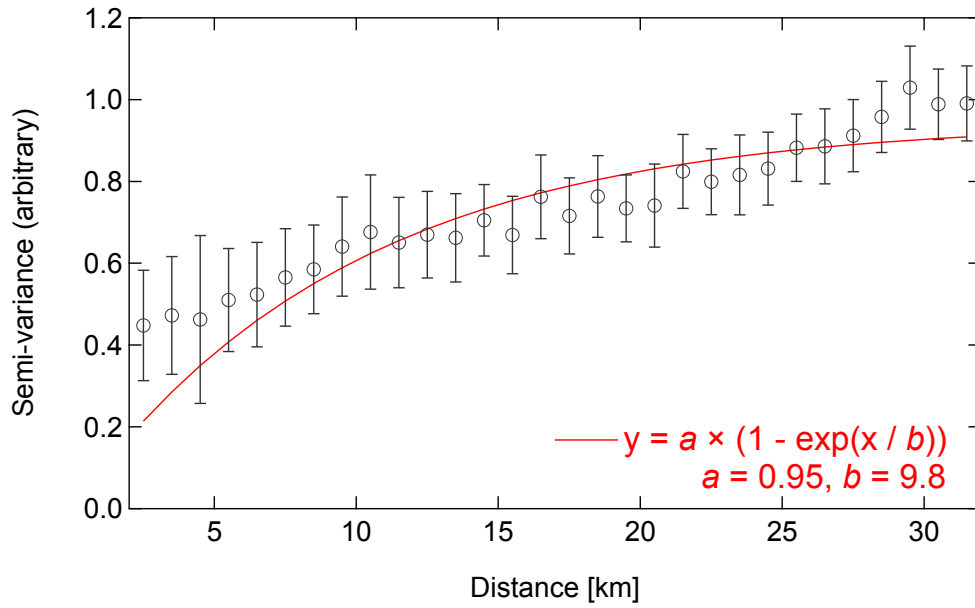

**Figure S4.** Semi-variogram calculated from the differences in nonpoint source elements between the ODIAC and MOSAIC emission data with both aggregated into a spatial resolution of  $0.025^\circ \times 0.025^\circ$ . The error bars indicate the standard error of each 1 km bin. The red line is the fitted curve with coefficients  $a$  and  $b$ , where coefficient  $b$  corresponds to the spatial correlation length.

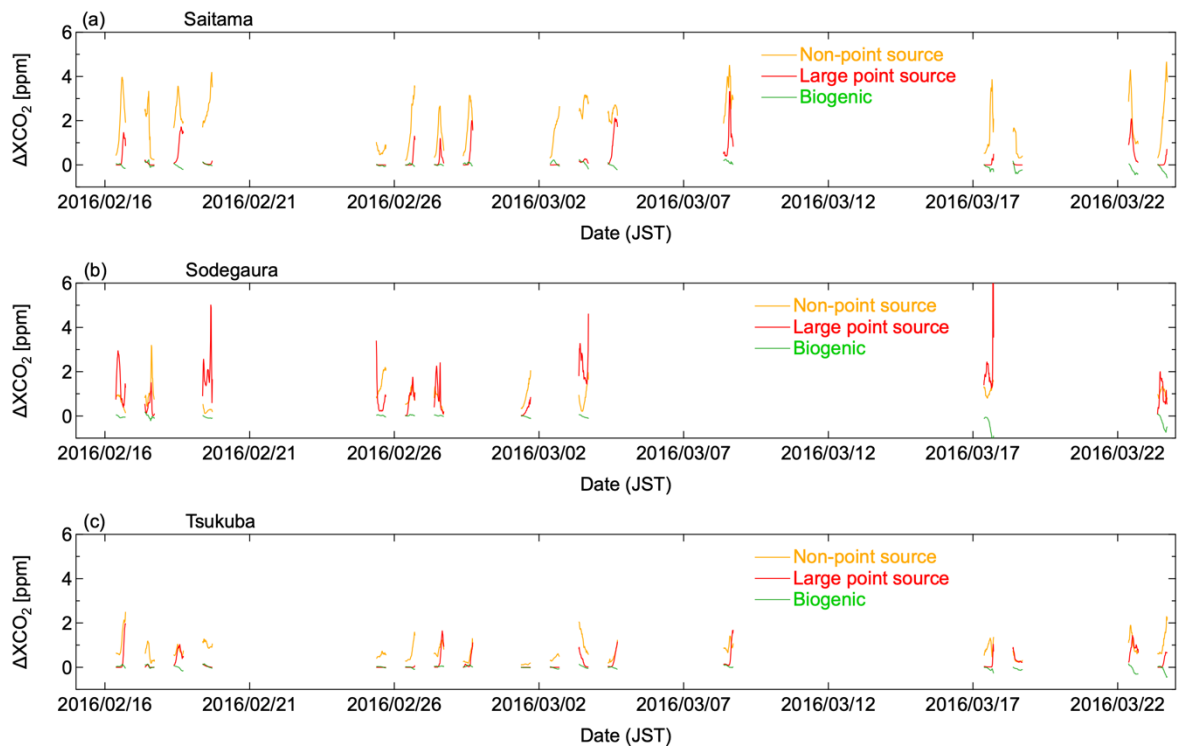

**Figure S5.**  $\Delta XCO_2$  values at (a) Saitama, (b) Sodegaura, and (c) Tsukuba simulated separately from nonpoint sources, large point sources, and biogenic fluxes.



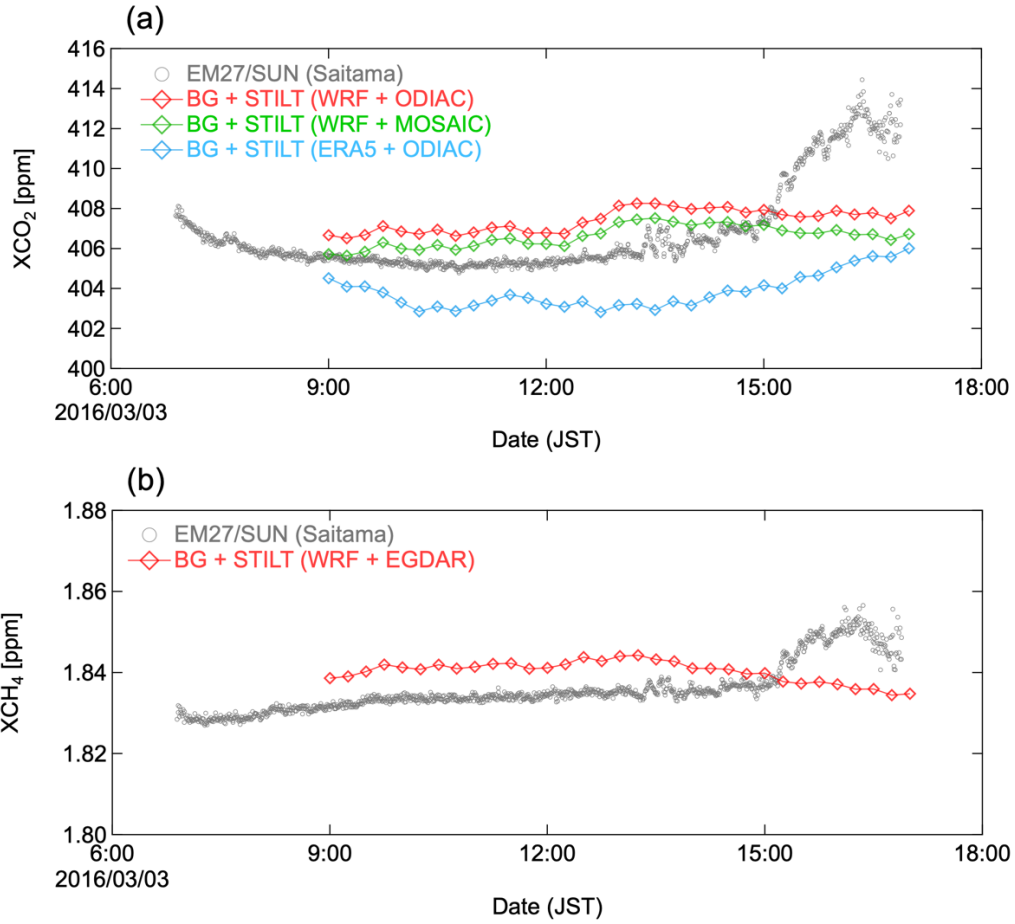

**Figure S6.** Comparison of (a) XCO<sub>2</sub> and (b) XCH<sub>4</sub> observations at Saitama on 3 March 2016 with STILT simulation results. The XCO<sub>2</sub> simulations were performed using three different combinations of meteorological fields and emission data, whereas the XCH<sub>4</sub> simulation was performed using the WRF model and EDGAR data.

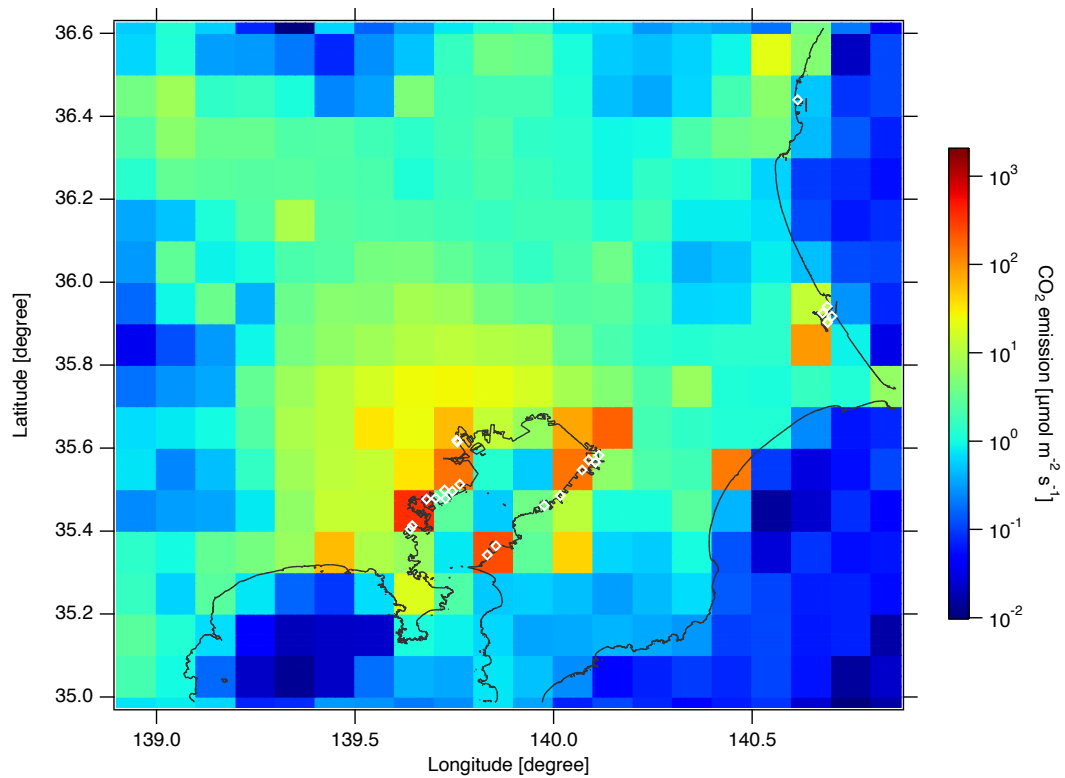

**Figure S7.** EDGAR version 6 CO<sub>2</sub> emission fluxes in the TMA in 2016. White diamonds indicate the locations of the large point sources considered in this study.

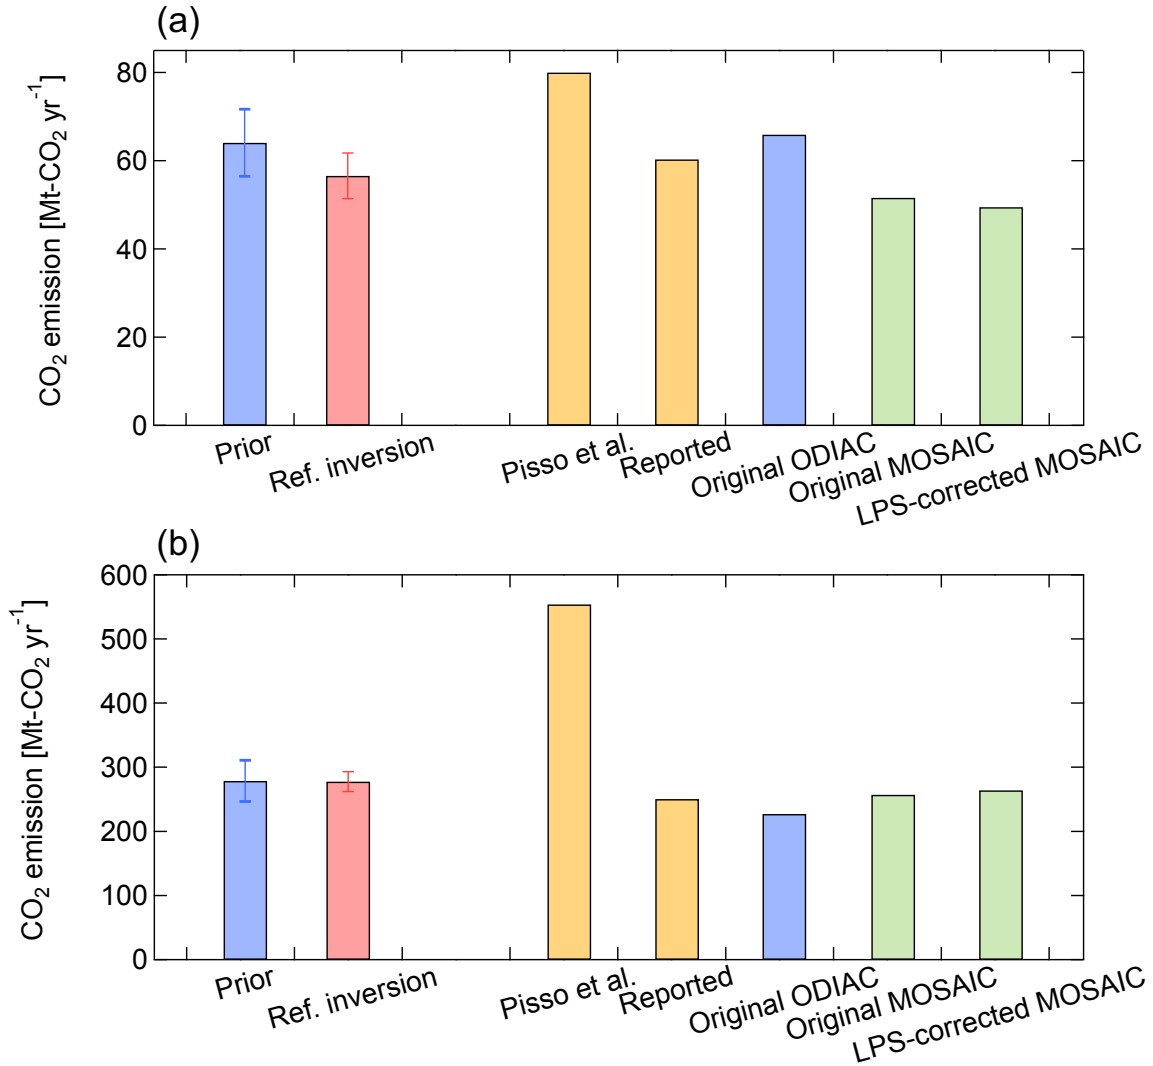

**Figure S8.** CO<sub>2</sub> emissions in (a) the Tokyo Metropolis and (b) southern Kanto (Tokyo Metropolis and Kanagawa, Saitama, and Chiba Prefectures) calculated from the posterior fluxes of the reference inversion (red), the ODIAC data (blue), and the MOSAIC data (green). The error bars for the prior and posterior estimates indicate uncertainties at the 95 % confidence level. For the ODIAC and MOSAIC data, both original and LPS-corrected total emissions are shown. Also shown are the CO<sub>2</sub> emissions for the corresponding domains extracted from Pisso et al. (2019) and the values reported by the administrative divisions (yellow).
